# Supplementary material for: Multiple Selection Criteria for Probiotic Strains with High Potential for Obesity Management
Source: PubMed Central journal article supplement (PMC7995962; doi:10.3390/nu13030713), 2021-02-24
Supplement: nutrients-13-00713-s001.pdf [file nutrients-13-00713-s001.pdf]

## Supplementary Material and Methods

### Evaluation of the DPP-4-like peptidase activity of the strains tested

Strains were incubated in 96-well optical black plates (Nunc, ThermoFisher Scientific, Rochester, NY, USA) at  $10^7$  CFU/ml with 1 mM Gly-Pro-AMC (Merck, Molsheim, France), a specific substrate of the dipeptidyl-peptidase-4 (DPP-4), in phosphate saline buffer pH 7.4 (PBS) in the presence or not of DPP-4 inhibitor(s). Ile-Pro-Ile (Diprotin A) was used at a final concentration of 0.5 mM and 5  $\mu$ L of a commercial DPP-IV inhibitor coming from Millipore (Merck) was added in relevant wells. Fluorescence was recorded every 2 min for 20 min under constant stirring at 37 °C using a Xenius spectrofluorometer (Safas Monaco, Monaco). Excitation and emission wavelengths were set to 260 nm and 480 nm, respectively. Data were expressed as the slope from the linear regression of the percentage of fluorescence as a function of time (n=3).

### Supplementary Tables

**Table S1: *In vitro* abilities of the probiotic strains to restore or strengthen an epithelial barrier and to exhibit an anti-inflammatory profile (from Alard *et al*, 2017).**

| Strains designation         | Improvement of Epithelial Barrier | IL-10 Induction | Anti-Inflammatory Profile (IL-10/IL-12) |
|-----------------------------|-----------------------------------|-----------------|-----------------------------------------|
| <i>B. lactis</i> LA306      | +                                 | ++              | ++                                      |
| <i>B. bifidum</i> LA803     | ++                                | ++++            | ++++                                    |
| <i>B. lactis</i> LA804      | +++                               | ++++            | ++++                                    |
| <i>B. breve</i> LA805       | ++                                | +++             | ++++                                    |
| <i>B. longum</i> PI10       | ++                                | +++             | ++++                                    |
| <i>B. bifidum</i> PI22      | ++                                | ++++            | ++++                                    |
| <i>La. rhamnosus</i> LA305  | +                                 | ++              | +++                                     |
| <i>Li. salivarius</i> LA307 | +                                 | ++              | +++                                     |
| <i>L. gasseri</i> LA806     | ++++                              | +/-             | +/-                                     |
| <i>Li. salivarius</i> PI2   | +                                 | ++              | ++                                      |
| <i>Lp. plantarum</i> PI3    | +                                 | +               | ++                                      |
| <i>L. acidophilus</i> PI4   | ++                                | +               | +/-                                     |
| <i>L. helveticus</i> PI5    | ++++                              | +               | ++                                      |
| <i>La. casei</i> PI8        | +++                               | ++              | ++                                      |
| <i>L. acidophilus</i> PI11  | ++++                              | +/-             | +/-                                     |
| <i>L. helveticus</i> PI13   | ++                                | ++              | +                                       |
| <i>La. paracasei</i> PI15   | ++                                | ++              | ++                                      |
| <i>La. paracasei</i> PI18   | +++                               | ++              | ++                                      |
| <i>Lp. plantarum</i> PI19   | +                                 | +               | +/-                                     |
| <i>La. casei</i> PI20       | ++                                | +               | +++                                     |
| <i>La. rhamnosus</i> PI28   | +                                 | +/-             | 0                                       |
| <i>S. thermophilus</i> PI21 | 0                                 | +/-             | 0                                       |
| <i>Lc. lactis</i> PI23      | 0                                 | +/-             | 0                                       |

**Table S2: Composition of the diets used in the study (g)** (source: Research Diets).

|                                       | <b>D12450B: 10% fat (LFD)</b> | <b>D12451: 45% fat (HFD)</b> |
|---------------------------------------|-------------------------------|------------------------------|
| Casein, 30 Mesh                       | 200                           | 200                          |
| L-Cystine                             | 3                             | 3                            |
| Corn Starch                           | 315                           | 72.8                         |
| Maltodextrin 10                       | 35                            | 100                          |
| Sucrose                               | 350                           | 172.8                        |
| Cellulose, BW200                      | 50                            | 50                           |
| Soybean Oil                           | 25                            | 25                           |
| Lard                                  | 20                            | 177.5                        |
| Mineral MIX S10026                    | 10                            | 10                           |
| Dicalcium Phosphate                   | 13                            | 13                           |
| Calcium Carbonate                     | 5.5                           | 5.5                          |
| Potassium Citrate, 1 H <sub>2</sub> O | 16.5                          | 16.5                         |
| Vitamin MIX V10001                    | 10                            | 10                           |
| Choline Bitartrate                    | 2                             | 2                            |
| FD&C Yellow Dye #5                    | 0.05                          | 0                            |
| FD&C Red Dye #40                      | 0                             | 0.05                         |

**Table S3: Forward and reverse primers' sequences used in the study.**

---

|         |                                |
|---------|--------------------------------|
| bact-F  | 5'-CTAAGGCCAACCGTGAAAAC-3'     |
| bact-R  | 5'-ACCAGAGGCATACAGGGACA-3'     |
| tnfa-F  | 5'-CCCTCACACTCAGATCATCTTCTC-3' |
| tnfa-R  | 5'-GGCTACAGGCTTGTCACTCG-3'     |
| cd36-F  | 5'-TCATTGCAACTGAGTGG-3'        |
| cd36-R  | 5'-TCATAAGCTCTGTGTCAG-3'       |
| cd68-F  | 5'-TGGCGGTGGAATACAATGTG-3'     |
| cd68-R  | 5'-GATGAATTCTGCGCCATGAA-3'     |
| mcp1-F  | 5'-TCAGCCAGATGCAGTTAACGC-3'    |
| mcp1-R  | 5'-TGATCCTCTTGTAGCTCTCCAGC-3'  |
| hcrt-F  | 5'-CCGTA ACTACCACCGCTTTAGC-3'  |
| hcrt-R  | 5'-AAGAGACTGACAGCGGCGAG-3'     |
| pomc-F  | 5'-CCGGTGAAGGTGTACCCCAA-3'     |
| pomc-R  | 5'-TCCAAGCCTAATGGCCGCT-3'      |
| lep-F   | 5'-AGGATGACACCAAACCCTCAT-3'    |
| lep-R   | 5'-AGTCCAAGCCAGTGACCCTCT-3'    |
| lepR-F  | 5'-CAGTGTGCGCTGGTTCTGTC-3'     |
| lepR-R  | 5'-TGTGAGGAGGTACGTGGTGAAG-3'   |
| fabp1-F | 5'-CCAATTGCAGAGCCAGGAGA-3'     |
| fabp1-R | 5'-CCCCTTGATGTCCTTCCCTTT-3'    |
| tgr5-R  | 5'-CCCAACTTTTIGTTTCCTTCCC-3'   |
| tgr5-F  | 5'-TAGCCGCACACTTCCATGG-3'      |
| gln-R   | 5'-AGGGACCTTTACCAGTGATGT-3'    |
| gln-F   | 5'-AATGGCGACTTCTTCTGGGAA-3'    |

---

**Table S4. Definition of bile acid clusters and ratios.**

| <b>Bile acid cluster</b>    | <b>Acronym and definition</b>                                                                      |
|-----------------------------|----------------------------------------------------------------------------------------------------|
| Free cholic acid            | CA                                                                                                 |
| Free chenodeoxycholic acid  | CDCA                                                                                               |
| Free deoxycholic acid       | DCA                                                                                                |
| Free lithocholic acid       | LCA                                                                                                |
| Free ursodeoxycholic acid   | UDCA                                                                                               |
| Free hyocholic acid         | HCA                                                                                                |
| Free hyodeoxycholic acid    | HDCA                                                                                               |
| Free alpha-muricholic acid  | $\alpha$ MCA                                                                                       |
| Free beta-muricholic acid   | $\beta$ MCA                                                                                        |
| Free omega-muricholic acid  | $\omega$ MCA                                                                                       |
| Glyco-cholic acid           | GCA                                                                                                |
| Glyco-chenodeoxycholic acid | GCDCA                                                                                              |
| Glyco-deoxycholic acid      | GDCA                                                                                               |
| Glyco-lithocholic acid      | GLCA                                                                                               |
| Glyco-ursodeoxycholic acid  | GUDCA                                                                                              |
| Glyco-hyocholic acid        | GHCA                                                                                               |
| Glyco-hyodeoxycholic acid   | GHDCA                                                                                              |
| Tauro-cholic acid           | TCA                                                                                                |
| Tauro-chenodeoxycholic acid | TCDC                                                                                               |
| Tauro-deoxycholic acid      | TDCA                                                                                               |
| Tauro-lithocholic acid      | TLCA                                                                                               |
| Tauro-ursodeoxycholic acid  | TUDCA                                                                                              |
| Tauro-hyocholic acid        | THCA                                                                                               |
| Tauro-hyodeoxycholic acid   | THDCA                                                                                              |
| Tauro-alpha-muricholic acid | T $\alpha$ MCA                                                                                     |
| Tauro-beta-muricholic acid  | T $\beta$ MCA                                                                                      |
| Tauro-omega-muricholic acid | T $\omega$ MCA                                                                                     |
| Total CDCA                  | CDCA + GCDCA + TCDC                                                                                |
| Total DCA                   | DCA + GDCA + THCA                                                                                  |
| Total LCA                   | LCA + GLCA + TLCA                                                                                  |
| Total UDCA                  | UDCA + GUDCA + TUDCA                                                                               |
| Total HCA                   | HCA + GHCA + THCA                                                                                  |
| Total HDCA                  | HDCA + GHDCA + THDCA                                                                               |
| Total primary BAs           | Total CA + Total CDCA + Total $\alpha$ MCA + Total $\beta$ MCA                                     |
| Total secondary BAs         | Total DCA + Total LCA + Total UDCA + Total HCA + Total HDCA                                        |
| Total free BAs              | CA + CDCA + DCA + LCA + UDCA + HCA + HDCA                                                          |
| Total conjugated            | GCA + GCDCA + GDCA + GLCA + GUDCA + GHCA + GHDCA + TCA + TCDC + TDCA + TLCA + TUDCA + THCA + THDCA |
| Total primary               | CA + CDCA + TCA + TCDC + GCA + GCDCA + $\alpha$ MCA + $\beta$ MCA                                  |
| Total secondary             | DCA + LCA + UDCA + HCA + HDCA + $\omega$ MCA + TDCA + TLCA + TUDCA + THCA + THDCA + T $\omega$ MCA |
| Total BAs                   | Total Free BAs + Total Conjugated BAs                                                              |
| Total 12 $\alpha$ OH BAs    | Total CA + Total DCA                                                                               |
| Total non12 $\alpha$ OH BAs | Total CDCA + Total LCA + Total UDCA + Total HCA + Total HDCA                                       |
| Ratio 12 $\alpha$ OH        | Total 12 $\alpha$ OH BAs / Total non12 $\alpha$ OH BAs                                             |

**Table S5 : Relative abundance of families and genera evaluated by 16S rRNA MiSeq sequencing in cecal contents of lean (LFD) and obese (HFD) mice treated or not with PI10 (HFD PI10) or the mixture (HFD + LA804/LA806).**

|                       | LFD              | HFD             | HFD + PI10       | HFD + LA804/ LA806 |
|-----------------------|------------------|-----------------|------------------|--------------------|
| Actinobacteria        | 402.25 ± 173.78  | 79 ± 24.97      | 331.62 ± 99.19   | 792.75 ± 261.53    |
| Alcaligenaceae        | 108.75 ± 70.02   | 41.875 ± 25.72  | 13 ± 10.62       | 37.375 ± 11.13     |
| Bifidobacteriaceae    | 306.25 ± 136.91  | 21 ± 7.49       | 225.5 ± 72.92    | 203.625 ± 25.41    |
| Clostridiaceae        | 48.75 ± 18.74    | 94.625 ± 31.99  | 269.125 ± 78.29  | 13.5 ± 7.28        |
| Coriobacteriaceae     | 96 ± 42.15       | 58 ± 14.74      | 106.125 ± 28.61  | 589.125 ± 250.92   |
| Peptostreptococcaceae | 3 ± 1.68         | 36.125 ± 16.16  | 23.125 ± 10.52   | 4.25 ± 2.20        |
| Ruminococcaceae       | 1482.25 ± 619.68 | 1107.25 ± 78.97 | 1986.25 ± 252.09 | 1414.375 ± 133.40  |

|                                | LFD             | HFD              |
|--------------------------------|-----------------|------------------|
| Bifidobacteriaceae             | 306.25 ± 136.91 | 21 ± 7.49        |
| Peptostreptococcaceae          | 3 ± 1.68        | 36.125 ± 16.16   |
| Streptococcaceae               | 272.25 ± 76.41  | 707 ± 77.33      |
| <i>Eubacterium rectale</i>     | 12.25 ± 3.01    | 0.5 ± 0.37       |
| <i>Bifidobacterium</i>         | 306.25 ± 273.82 | 21 ± 7.49        |
| <i>Blautia</i>                 | 78 ± 91.72      | 557.625 ± 125.80 |
| <i>Eisenbergiella</i>          | 31.5 ± 9.32     | 1.125 ± 0.47     |
| <i>Faecalibacterium</i>        | 535.75 ± 999.23 | 0.25 ± 0.25      |
| <i>Lachnospiraceae</i> NK4A136 | 944 ± 503.80    | 404.375 ± 86.95  |
| <i>Lactococcus</i>             | 269.25 ± 149.97 | 700.75 ± 77.76   |
| <i>Oscillibacter</i>           | 38.25 ± 32.11   | 129.625 ± 13.49  |
| <i>Parabacteroides</i>         | 16 ± 5.35       | 141.75 ± 45.43   |
| <i>Peptoclostridium</i>        | 3 ± 3.36        | 36.125 ± 16.16   |
| <i>Peptococcus</i>             | 4.75 ± 4.92     | 14.625 ± 2.54    |
| <i>Rikenellaceae</i> RC9 gut   | 397 ± 350.68    | 74.875 ± 16.96   |
| <i>Ruminiclostridium</i>       | 17.75 ± 13.04   | 84.875 ± 20.24   |
| <i>Ruminiclostridium</i> 9     | 139.75 ± 64.2   | 359 ± 43.09      |
| <i>Ruminococcaceae</i> UCG-014 | 302.5 ± 129.97  | 49.125 ± 16.39   |
| <i>Ruminococcus</i> 1          | 0.25 ± 0.5      | 21.125 ± 7.18    |
| <i>Turicibacter</i>            | 0 ± 0.00        | 29.625 ± 9.46    |

|                                | HFD              | HFD-PI10         |
|--------------------------------|------------------|------------------|
| Actinobacteria                 | 79 ± 24.97       | 331.625 ± 99.19  |
| Bifidobacteriaceae             | 21 ± 7.49        | 225.5 ± 72.92    |
| Ruminococcaceae                | 1107.25 ± 78.97  | 1986.25 ± 252.09 |
| <i>Bifidobacterium</i>         | 21 ± 7.49        | 225.5 ± 72.92    |
| <i>Blautia</i>                 | 557.625 ± 125.8  | 207.75 ± 40.48   |
| <i>Enterorhabdus</i>           | 33.125 ± 8.48    | 73.625 ± 16.73   |
| <i>Lachnoclostridium</i>       | 446.125 ± 112.71 | 167.625 ± 40.25  |
| <i>Parabacteroides</i>         | 141.75 ± 45.43   | 36 ± 15.10       |
| <i>Roseburia</i>               | 220.125 ± 39.73  | 36.125 ± 6.82    |
| <i>Ruminococcaceae</i> UCG-014 | 49.125 ± 16.39   | 560.625 ± 143.67 |
| <i>Ruminococcus 1</i>          | 21.125 ± 7.18    | 143.25 ± 42.09   |

|                                    | HFD             | HFD + LA804/ LA806 |
|------------------------------------|-----------------|--------------------|
| Actinobacteria                     | 79 ± 24.97      | 792.75 ± 261.53    |
| Bifidobacteriaceae                 | 21 ± 26.16      | 203.625 ± 25.41    |
| Clostridiaceae 1                   | 94.625 ± 25.87  | 13.5 ± 7.28        |
| Coriobacteriaceae                  | 58 ± 16.87      | 589.125 ± 250.49   |
| <i>Bifidobacterium</i>             | 21 ± 7.49       | 203.625 ± 25.41    |
| <i>Clostridium sensu stricto 1</i> | 94.625 ± 90.48  | 13.5 ± 7.28        |
| <i>Coriobacteriaceae</i> UCG-002   | 22.875 ± 28.06  | 460.125 ± 244.42   |
| <i>Oscillibacter</i>               | 129.625 ± 38.15 | 59.875 ± 7.78      |

Data are expressed as mean ± SEM values.

**Table S6. Portal plasma BA concentrations.** Means (and SEM), p-values from non-parametric Mann-Whitney test. p-values in bold are statistically significant.

| nM             | LFD            | HFD            | HFD-P10        | HFD-LA804/LA806 | p (HFD vs LFD) | p (HFD-P10 vs HFD) | p (HFD-LA804/LA806 vs HFD) |
|----------------|----------------|----------------|----------------|-----------------|----------------|--------------------|----------------------------|
| CA             | 2921<br>(1664) | 1521<br>(1383) | 1547<br>(1087) | 1512<br>(1460)  | 0.23           | 0.80               | >0.99                      |
| CDCA           | 297<br>(198)   | 47<br>(74)     | 61<br>(104)    | 38<br>(56)      | <b>0.036</b>   | 0.76               | 0.75                       |
| DCA            | 407<br>(244)   | 549<br>(360)   | 591<br>(261)   | 471<br>(298)    | 0.65           | 0.69               | 0.46                       |
| LCA            | 0<br>(0)       | 0<br>(0)       | 0<br>(0)       | 0<br>(0)        | >0.99          | >0.99              | >0.99                      |
| UDCA           | 856<br>(318)   | 286<br>(233)   | 101<br>(118)   | 372<br>(342)    | <b>0.009</b>   | 0.28               | 0.61                       |
| $\alpha$ MCA   | 656<br>(499)   | 240<br>(468)   | 288<br>(376)   | 673<br>(1164)   | <b>0.036</b>   | 0.39               | 0.31                       |
| $\beta$ MCA    | 4848<br>(994)  | 1406<br>(1989) | 1131<br>(1390) | 1945<br>(2327)  | <b>0.042</b>   | 0.78               | 0.54                       |
| $\omega$ MCA   | 2103<br>(1071) | 723<br>(903)   | 583<br>(571)   | 1099<br>(1659)  | 0.11           | 0.96               | 0.46                       |
| HCA            | 0<br>(0)       | 0<br>(0)       | 0<br>(0)       | 0<br>(0)        | >0.99          | >0.99              | >0.99                      |
| HDCA           | 99<br>(127)    | 63<br>(89)     | 124<br>(115)   | 58<br>(94)      | 0.5            | 0.14               | 0.84                       |
| TCA            | 2045<br>(1121) | 863<br>(670)   | 741<br>(584)   | 1006<br>(813)   | 0.11           | 0.87               | 0.87                       |
| TCDC           | 141<br>(93)    | 102<br>(97)    | 126<br>(100)   | 87<br>(66)      | 0.53           | 0.69               | >0.99                      |
| TDCA           | 119<br>(63)    | 256<br>(148)   | 245<br>(124)   | 258<br>(189)    | 0.16           | >0.99              | 0.96                       |
| TLCA           | 0<br>(0)       | 0<br>(0)       | 0<br>(0)       | 0<br>(0)        | >0.99          | >0.99              | >0.99                      |
| TUDCA          | 51<br>(19)     | 50<br>(40)     | 48<br>(24)     | 53<br>(49)      | 0.93           | >0.99              | 0.96                       |
| T $\alpha$ MCA | 937<br>(516)   | 495<br>(503)   | 587<br>(483)   | 670<br>(588)    | 0.11           | 0.64               | 0.40                       |
| T $\beta$ MCA  | 1206<br>(338)  | 618<br>(811)   | 500<br>(416)   | 759<br>(595)    | 0.22           | 0.87               | 0.51                       |
| T $\omega$ MCA | 110<br>(114)   | 69<br>(123)    | 215<br>(268)   | 224<br>(268)    | 0.5            | 0.37               | 0.11                       |
| THCA           | 0<br>(0)       | 0<br>(0)       | 0<br>(0)       | 0<br>(0)        | >0.99          | >0.99              | >0.99                      |
| THDCA          | 7<br>(14)      | 17<br>(14)     | 41<br>(51)     | 17<br>(27)      | 0.17           | 0.41               | 0.33                       |

**Table S7. BA proportions in cecal contents.** Means (and SEM), p-values from non-parametric Mann-Whitney test. P-values in bold are statistically significant.

| %              | LFD       | HFD       | HFD-<br>P10 | HFD-<br>LA804/LA806 | p (HFD<br>vs LFD) | p (HFD-<br>P10 vs<br>HFD) | p (HFD-<br>LA804/LA806-<br>vs HFD) |
|----------------|-----------|-----------|-------------|---------------------|-------------------|---------------------------|------------------------------------|
| CA             | 5<br>(2)  | 6<br>(2)  | 6<br>(2)    | 6<br>(4)            | 0.46              | 0.80                      | 0.83                               |
| CDCA           | 0<br>(0)  | 0<br>(0)  | 0<br>(0)    | 0<br>(0)            | >0.99             | >0.99                     | >0.99                              |
| DCA            | 17<br>(2) | 32<br>(6) | 29<br>(6)   | 28<br>(10)          | <b>0.006</b>      | 0.24                      | 0.33                               |
| LCA            | 0<br>(0)  | 1<br>(0)  | 0<br>(0)    | 0<br>(0)            | 0.24              | 0.13                      | 0.10                               |
| UDCA           | 4<br>(3)  | 2<br>(2)  | 3<br>(1)    | 4<br>(2)            | 0.40              | 0.47                      | 0.15                               |
| $\alpha$ MCA   | 10<br>(3) | 9<br>(4)  | 12<br>(4)   | 13<br>(4)           | 0.55              | 0.16                      | 0.10                               |
| $\beta$ MCA    | 33<br>(7) | 16<br>(6) | 21<br>(7)   | 26<br>(7)           | <b>0.012</b>      | 0.16                      | <b>0.020</b>                       |
| $\omega$ MCA   | 24<br>(3) | 25<br>(4) | 18<br>(2)   | 16<br>(3)           | 0.69              | <b>0.0009</b>             | <b>0.002</b>                       |
| HCA            | 0<br>(0)  | 0<br>(0)  | 0<br>(0)    | 0<br>(0)            | >0.99             | >0.99                     | >0.99                              |
| HDCA           | 4<br>(1)  | 5<br>(2)  | 6<br>(2)    | 4<br>(1)            | 0.31              | 0.50                      | 0.09                               |
| TCA            | 0<br>(0)  | 1<br>(0)  | 0<br>(0)    | 0<br>(0)            | >0.99             | >0.99                     | 0.56                               |
| TCDCa          | 0<br>(0)  | 0<br>(0)  | 0<br>(0)    | 0<br>(0)            | >0.99             | >0.99                     | >0.99                              |
| TDCA           | 0<br>(0)  | 0<br>(0)  | 0<br>(0)    | 0<br>(0)            | >0.99             | >0.99                     | >0.99                              |
| TLCA           | 0<br>(0)  | 0<br>(0)  | 0<br>(0)    | 0<br>(0)            | >0.99             | >0.99                     | >0.99                              |
| TUDCA          | 0<br>(0)  | 0<br>(0)  | 0<br>(0)    | 0<br>(0)            | >0.99             | >0.99                     | >0.99                              |
| T $\alpha$ MCA | 1<br>(0)  | 0<br>(0)  | 1<br>(0)    | 0<br>(0)            | 0.55              | >0.99                     | >0.99                              |
| T $\beta$ MCA  | 1<br>(0)  | 1<br>(1)  | 2<br>(1)    | 1<br>(0)            | 0.83              | 0.11                      | >0.99                              |
| T $\omega$ MCA | 1<br>(0)  | 1<br>(0)  | 1<br>(1)    | 0<br>(0)            | >0.99             | 0.48                      | 0.27                               |
| THCA           | 0<br>(0)  | 0<br>(0)  | 0<br>(0)    | 0<br>(0)            | >0.99             | >0.99                     | >0.99                              |
| THDCA          | 0<br>(0)  | 0<br>(0)  | 0<br>(0)    | 0<br>(0)            | >0.99             | >0.99                     | >0.99                              |



Supplementary Figures

**A**

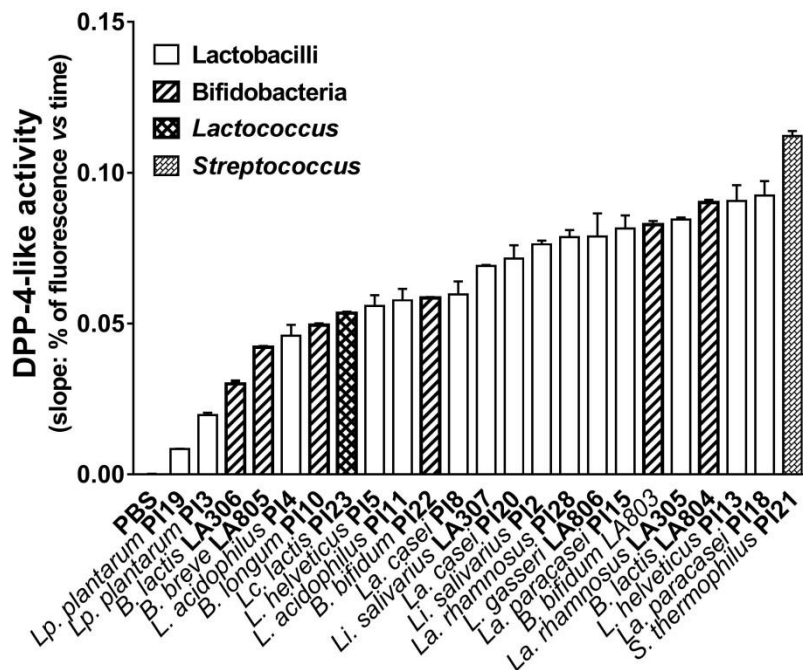

**B**

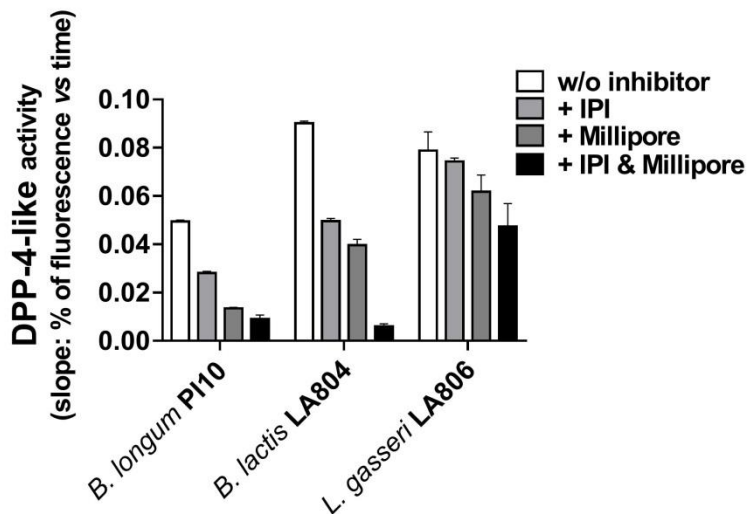

**Figure S1 : DPP-4 like activity of the strains.** (A) DPP-4-like activity of the strains evaluated by their ability to cleave the Gly-Pro-AMC which led to fluorescence emission. (B) DPP-IV-like activity of the three strains used *in vivo* in presence or absence of DPP-IV inhibitors: IPI and Millipore. The DPP-IV-like activity is expressed by the slope from the linear regression of the percentage of fluorescence as a function of time (n=3).
